# Supplementary material for: Preference for enzalutamide capsules versus tablet pills in patients with prostate cancer
Source: PubMed Central journal article supplement (PMC6916586; doi:10.1111/iju.14101), 2019-09-18
Supplement: IJU-26-1161-s003.pdf [file IJU-26-1161-s003.pdf]

Supportive table 1:

Capsule: #0 capsule (NISSIN MEDICAL INSTRUMENT CO., Osaka, Japan)

Tablet: Dear-Natura Vitamin C, E, A (Asahi Group Foods, Tokyo, Japan)
